# Supplementary material for: Are Matrix Metalloproteinase-9 and Tissue Inhibitor of Metalloproteinase-1 Useful as Markers in Diagnostic Management of Children with Newly Diagnosed Ulcerative Colitis?
Source: MDPI journal article supplement (doi:10.3390/jcm11092655), 2022-05-09
Supplement: s1 [file s1]

**Table S1.** Immunohistochemical staining of MMP-9 and TIMP-1 in biopsy samples of patients with Colitis Ulcerosa (CU) and control Group (Ctr).

|     | MMP-9 Staining |           |           |                                    | TIMP-1 Staining |         |           |                                    |
|-----|----------------|-----------|-----------|------------------------------------|-----------------|---------|-----------|------------------------------------|
|     | Intensity      | Extent    | Sum score | Expression in glandular epithelium | Intensity       | Extent  | Sum score | Expression in glandular epithelium |
| CU  | 2 (1-3)        | 4 (1-4)   | 6 (2-7)   | 70% (20-100%)                      | 3 (1-3)         | 4 (2-4) | 7 (3-7)   | 100% (30-100%)                     |
| Ctr | 0.5 (0-1)      | 0.5 (0-1) | 1 (0-2)   | 1.5% (0-10%)                       | 0 (0-1)         | 0 (0-5) | 0 (0-2)   | 0% (0-5%)                          |

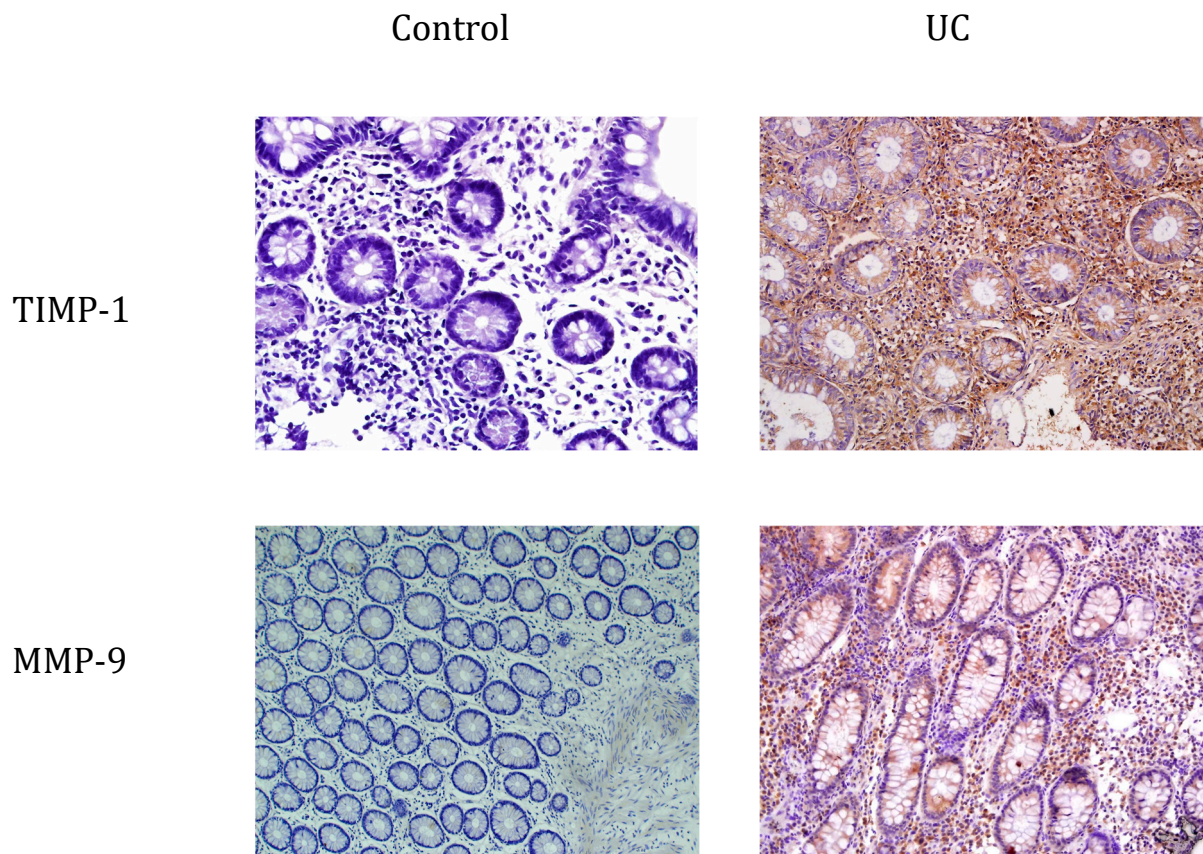

**Figure S1:** Immunohistochemical staining showing mucosal expression of TIMP-1 and MMP-9 in UC and Control group
